# Supplementary material
Source: PubMed Central journal article supplement (PMC8186207)
Supplement: 12909_2021_2782_MOESM1_ESM.pdf [file 12909_2021_2782_MOESM1_ESM.pdf]

# Teaching scripts via smartphone app facilitate resident-led teaching of medical students

Nicholas R. Zessis\*<sup>1</sup>, Amanda R. Dube<sup>2</sup>, Arhanti Sadanand<sup>3</sup>, Jordan J. Cole<sup>4</sup>, Christine M. Hrach<sup>2</sup>, and Yasmeen N. Daud<sup>2</sup>

<sup>1</sup>Department of Pediatrics, Northwestern University Feinberg School of Medicine, Chicago, Illinois, USA

<sup>2</sup>Department of Pediatrics, Washington University School of Medicine, Saint Louis, Missouri, USA

<sup>3</sup>Department of Pediatrics, Emory University School of Medicine, Atlanta, Georgia, USA

<sup>4</sup>Department of Neurology, Washington University School of Medicine, Saint Louis, Missouri, USA

\*Corresponding Author:

Nicholas R. Zessis

Department of Pediatrics, Northwestern University Feinberg School of Medicine  
225 East Chicago Avenue, Box 152  
Chicago, Illinois, USA 60611

Telephone: 312-227-7410

Fax: 312-227-9525

Email: [nzessis@northwestern.edu](mailto:nzessis@northwestern.edu)

**Additional file 1: MS3 Perception of Resident Teaching, 2017 and 2018**

# MS3 Perception of Resident Teaching, 2017 and 2018

There are 5 questions in this anonymous and voluntary survey. It should take about 5 minutes to complete. Thank you for your input!

\* Required

1. Have you completed all of your core clerkships (Pediatrics, Internal Medicine, Surgery, Obstetrics & Gynecology, Psychiatry, Neurology)? \*

*Mark only one oval.*

Yes

No

## Quality of Resident Teaching

2. Please rank the following clerkships in order of quality of RESIDENT teaching, with one being the worst and six being the best. \*

Each specialty should only be ranked once, and each ranking should only be used once.

*Mark only one oval per row.*

|                         | One                   | Two                   | Three                 | Four                  | Five                  | Six                   |
|-------------------------|-----------------------|-----------------------|-----------------------|-----------------------|-----------------------|-----------------------|
| Pediatrics              | <input type="radio"/> | <input type="radio"/> | <input type="radio"/> | <input type="radio"/> | <input type="radio"/> | <input type="radio"/> |
| Internal Medicine       | <input type="radio"/> | <input type="radio"/> | <input type="radio"/> | <input type="radio"/> | <input type="radio"/> | <input type="radio"/> |
| Surgery                 | <input type="radio"/> | <input type="radio"/> | <input type="radio"/> | <input type="radio"/> | <input type="radio"/> | <input type="radio"/> |
| Neurology               | <input type="radio"/> | <input type="radio"/> | <input type="radio"/> | <input type="radio"/> | <input type="radio"/> | <input type="radio"/> |
| Psychiatry              | <input type="radio"/> | <input type="radio"/> | <input type="radio"/> | <input type="radio"/> | <input type="radio"/> | <input type="radio"/> |
| Obstetrics & Gynecology | <input type="radio"/> | <input type="radio"/> | <input type="radio"/> | <input type="radio"/> | <input type="radio"/> | <input type="radio"/> |

3. How much do you value resident teaching as part of your clinical education? (1 being not important at all and 5 being extremely important)

*Mark only one oval.*

|                                      | 1                     | 2                     | 3                     | 4                     | 5                     |                                     |
|--------------------------------------|-----------------------|-----------------------|-----------------------|-----------------------|-----------------------|-------------------------------------|
| Not important to my education at all | <input type="radio"/> | <input type="radio"/> | <input type="radio"/> | <input type="radio"/> | <input type="radio"/> | Extremely important to my education |

4. In your opinion, what qualities make a resident an effective teacher? \*

---

---

---

---

---

5. Alternatively, what qualities make a resident an ineffective teacher? \*

---

---

---

---

---

---

This content is neither created nor endorsed by Google.

Google Forms
