# Supplementary material
Source: PubMed Central journal article supplement (PMC8186207)
Supplement: 12909_2021_2782_MOESM2_ESM.pdf [file 12909_2021_2782_MOESM2_ESM.pdf]

# Teaching scripts via smartphone app facilitate resident-led teaching of medical students

Nicholas R. Zessis\*<sup>1</sup>, Amanda R. Dube<sup>2</sup>, Arhanti Sadanand<sup>3</sup>, Jordan J. Cole<sup>4</sup>, Christine M. Hrach<sup>2</sup>, and Yasmeen N. Daud<sup>2</sup>

<sup>1</sup>Department of Pediatrics, Northwestern University Feinberg School of Medicine, Chicago, Illinois, USA

<sup>2</sup>Department of Pediatrics, Washington University School of Medicine, Saint Louis, Missouri, USA

<sup>3</sup>Department of Pediatrics, Emory University School of Medicine, Atlanta, Georgia, USA

<sup>4</sup>Department of Neurology, Washington University School of Medicine, Saint Louis, Missouri, USA

\*Corresponding Author:

Nicholas R. Zessis

Department of Pediatrics, Northwestern University Feinberg School of Medicine  
225 East Chicago Avenue, Box 152  
Chicago, Illinois, USA 60611

Telephone: 312-227-7410

Fax: 312-227-9525

Email: [nzessis@northwestern.edu](mailto:nzessis@northwestern.edu)

**Additional file 2: Pre-Intervention: Survey of Resident-Led Teaching of Medical Students, 2017; Post-Intervention: Survey of Resident-Led Teaching of Medical Students, 2017 and 2018**

*Pre-Intervention: Questions 2 and 6 did not lead to data that was directly discussed in the manuscript*

## Survey of Resident-Led Teaching of Medical Students, 2017

There are 9 questions in this anonymous and voluntary survey. It should take about 5 minutes to complete. Thank you for your input!

\* Required

1. What year are you? \*

Mark only one oval.

PGY-1

PGY-2

PGY-3

2. When you were a medical student, to what extent did you find resident-led teaching to be helpful? \*

Mark only one oval.

1      2      3      4      5

---

It was not helpful at all.      It was the most helpful part of the clerkship.

---

3. How often do you feel residents should be involved in teaching medical students while on the floors? \*

*Mark only one oval.*

- Never
- At least once per month
- At least weekly
- Several times a week
- Daily
- More than once per day

4. In prior four-week rotations as a resident, on average, how often did you teach medical students (regardless of duration)? \*

*Mark only one oval.*

- Never
- Monthly
- Weekly
- Several times a week
- Daily
- More than once per day
- I haven't worked with medical students as a resident yet

5. In these prior rotations, how much time did you spend on average per teaching session? \*

*Mark only one oval.*

- 1-2 minutes  
 About 5 minutes  
 About 10 minutes  
 About 15 minutes  
 About 20 minutes or more  
 I didn't teach at all

6. To what extent are you satisfied with the amount of time you were able to invest in medical student teaching? \*

*Mark only one oval.*

- Very dissatisfied  
 Dissatisfied  
 Neutral  
 Satisfied  
 Very Satisfied

7. What are the qualities of an effective resident teacher? \*

---

---

---

8. Alternatively, what are the qualities of an ineffective resident teacher? \*

---

---

---

---

---

9. What are the barriers, if any, to teaching medical students at Washington University School of Medicine? \*

*Check all that apply.*

- Medical student availability
- The medical students aren't interested
- I'm not interested in teaching
- Difficulty finding a physical location to teach
- It's not my responsibility, the fellows and attendings take ownership
- High volume of patients/not enough time
- I don't feel prepared or don't have the skills necessary to teach
- I want to teach, but I don't know what topic to teach or where to get started
- There are no barriers.

Other:  \_\_\_\_\_

---

This content is neither created nor endorsed by Google.

Google Forms

*Post-Intervention: Questions 5, 8, and 9 did not lead to data that was directly discussed in the manuscript*

## Survey of Resident-Led Teaching of Medical Students, 2017-2018

There are 9 questions in this anonymous and voluntary survey. It should take about 5 minutes to complete. Thank you for your input!

\* Required

1. What year are you? \*

*Mark only one oval.*

- PGY-1
- PGY-2
- PGY-3

2. Over the last 4 weeks, how frequently did you teach medical students on average? \*

*Mark only one oval.*

- Never
- Every other week
- Weekly
- Several times a week
- Daily
- More than once per day

3. How much time did you spend on these teaching sessions on average? \*

*Mark only one oval.*

- 1-2 minutes
- About 5 minutes
- About 10 minutes
- About 15 minutes
- About 20 minutes or more
- I didn't teach at all

4. Of your teaching sessions to medical students, about what percentage of them did you utilize our resources in the Dorsata app? \*

*Mark only one oval.*

- 0%
- 1-24%
- 25-49%
- 50-74%
- 75-100%

5. Which of our teaching script content did you use the most? \*

*Mark only one oval.*

- Powerpoint (in traditional format)
- Powerpoints (in Q&A format)
- Notecards (in outline format)
- I didn't use any of them

6. To what extent do you agree with the following: The teaching scripts enabled me to initiate more frequent and reliable teaching of medical students. \*

*Mark only one oval.*

- Strongly Disagree  
 Disagree  
 Neutral  
 Agree  
 Strongly Agree

7. On future rotations with medical students, do you anticipate utilizing these resources in any capacity? \*

*Mark only one oval.*

- No  
 Unsure  
 Yes

8. In what ways are these tools helpful? \*

---

---

---

---

---



9. In what ways could these tools be improved? \*

---

---

---

---

---

---

This content is neither created nor endorsed by Google.

Google Forms
